# Supplementary material
Source: HighWire-hosted journal article supplement (https://veterinaryrecord.bmj.com/content/187/1/27)
Supplement: inline-supplementary-material-1 [file inline-supplementary-material-1.pdf]

**Supplementary tables:**

**Supplement 1** Description of the categories of cats for household, along with other potential explanatory factors for the selected health, behaviour and owner care variables. Data for these factors were extracted from questionnaires 1 to 5 (Q1: age two-four months; Q5: age two-and-a-half years respectively) in the Bristol Cats Study

| Explanatory factor        | Source<br>(Questionnaire number – question number(s) paper version; online version) | Description                                                                                                 | Categories                                                                                                         |
|---------------------------|-------------------------------------------------------------------------------------|-------------------------------------------------------------------------------------------------------------|--------------------------------------------------------------------------------------------------------------------|
| Household                 | Q1- D5; 38<br>Q2- A1; 1<br>Q3- A5; 5<br>Q4- A5; 5<br>Q5- A5, E13*; 5,73*            | Between Q1 and Q5 inclusive, the single/multi-cat status of the study cat.*                                 | Single cat household<br>Multi-cat household*<br>Agonistic multi-cat household<br>Non-agonistic multi-cat household |
| Tenure                    | Q1- G5; 63                                                                          | Owner reports renting or owning the property where the study cat resides                                    | Rent<br>Own                                                                                                        |
| Income                    | Q1- G6; 64                                                                          | Annual household income                                                                                     | ≤£24,999<br>£25,000-£49,999<br>≥£50,000                                                                            |
| Education                 | Q1- G7; 65                                                                          | Highest level of education achieved by any member of the household                                          | A levels or equivalent or below<br>Degree or above                                                                 |
| Age of owner              | Q1- G10; 68                                                                         | Owner reported age                                                                                          | ≤24 years old<br>25-54 years old<br>≥ 55 years old                                                                 |
| Owned cat before          | Q1- A6; 6                                                                           | The owner has owned a cat before the study cat as an adult                                                  | Yes<br>No                                                                                                          |
| Children in house         | Q1- G2; 60                                                                          | Children <16 years old in household                                                                         | Yes<br>No                                                                                                          |
| Playing time              | Q5- B1; 8                                                                           | How often the cat is reported to play with a human member of the household                                  | Most days/quite often<br>Not often/never                                                                           |
| Sex                       | Q1- A3; 3                                                                           | Owner reported sex of cat                                                                                   | Male<br>Female                                                                                                     |
| Mixed/Pure breed          | Q1- A4; 4                                                                           | Owner reported breed of cat, categorised.                                                                   | DSH/DLH/mixed breed<br>Purebred                                                                                    |
| Time spent outdoors       | Q5- B4; 11                                                                          | Amount of time cat spends outdoors as reported by owner                                                     | Never/hardly any<br>A little/ equal amounts<br>Indoor and outdoor<br>Most/all                                      |
| Neighbourhood cat density | Q5- G6; 89                                                                          | The number of cats from other households that the owner knows of in that are in the immediate neighbourhood | 0- 5<br>6+                                                                                                         |

|                                     |                                                                    |                                                                                        |                                                              |
|-------------------------------------|--------------------------------------------------------------------|----------------------------------------------------------------------------------------|--------------------------------------------------------------|
| Neighbourhood cats stare in windows | Q5- G7; 90                                                         | Neighbouring cats stare into the house through cat flaps, doors or windows             | Yes<br>No                                                    |
| Neighbourhood cats come in house    | Q5- G10; 93                                                        | Neighbouring cats come into the house                                                  | Yes<br>No                                                    |
| Neighbourhood cats come in garden   | Q5- G11; 94                                                        | Neighbouring cats come into the garden                                                 | Yes<br>No                                                    |
| Insured†                            | Q5- D8; 46                                                         | Owner reported insurance status of cat                                                 | Yes (insured)<br>No (uninsured)                              |
| Vaccinated†                         | Q5- D9; 47                                                         | Owner reported up to date, or reported vaccination date within last 365 days           | Up to date<br>Lapsed/Never vaccinated                        |
| Neutered                            | Q5- F6; 81                                                         | Owner reported neuter status of study cat                                              | Yes (neutered)<br>No (entire)                                |
| Location of house                   | Q1- F1; 49<br>Q2- H3; 79<br>Q3- G3; 74<br>Q4- G3; 71<br>Q5- G3; 87 | Location of house reported by owner                                                    | In a rural or village location<br>In a town or city location |
| Presence of garden                  | Q1- F2; 50<br>Q2- H4; 80<br>Q3- G4; 75<br>Q4- G4; 72<br>Q5- G4; 88 | Owner reports if household where cat resides has a garden (including communal gardens) | Yes<br>No                                                    |
| Initial 'BS' postcode cohort        | Bristol Cat ID number                                              | Owner was included in the initial restriction to the Bristol (BS postcode) area        | Non-BS postcode<br>BS postcode                               |
| Negative interaction with owner     | Q5- E4; 64                                                         | Study cat reported to run away, hiss, growl or swipe when approached by owner          | Yes<br>No                                                    |

\* See materials and methods for definitions

†Insurance and vaccination were included as outcomes, as well as potential explanatory factors for the other outcomes

Q1 = questionnaire 1 (2-4 months); Q2 = questionnaire 2 (6 months); Q3 = questionnaire 3 (12 months); Q4 = questionnaire 4 (18 months); Q5 = questionnaire 5 (2.5 years); DSH = domestic shorthair; DLH = domestic longhair

**Supplement 2** The number of households from the study cohort that have multiple cats

| <b>Number of cats</b> | <b>Number of households<br/>N (%)</b> |
|-----------------------|---------------------------------------|
| Two                   | 265 (43.0)                            |
| Three                 | 130 (21.1)                            |
| Four                  | 65 (10.6)                             |
| Five-nine             | 129 (20.9)                            |
| Ten- fourteen         | 20 (3.2)                              |
| More than fifteen     | 7 (1.1)                               |

**Supplement 3** Univariable analysis for overweight/obesity and periuria for association with single, agonistic and non-agonistic multi-cat households in a UK cat cohort at age 2.5 years. These were not taken forward to multivariable analysis.

| Household | Number of cases n (%) | Number of controls n (%) | P-value | OR (95% CI)      |
|-----------|-----------------------|--------------------------|---------|------------------|
| SCH       | 28 (17.5)             | 132 (82.5)               | 0.388   | 1.0              |
| AMCH      | 81 (21.9)             | 289 (78.1)               | 0.252   | 1.32 (0.82-2.13) |
| NMCH      | 41 (18.2)             | 184 (81.8)               | 0.856   | 1.05 (0.62-1.79) |
| SCH       | 15 (10.8)             | 124 (89.2)               | 0.556   | 1.0              |
| AMCH      | 45 (14.5)             | 266 (85.5)               | 0.291   | 1.39 (0.75-2.61) |
| NMCH      | 23 (12.7)             | 158 (87.3)               | 0.600   | 1.20 (0.60-2.40) |

SCH= single cat household; AMCH= agonistic multi-cat household, NMCH= non-agonistic multi-cat household

**Supplement 4** Univariable analysis for owner reported abscess/cat bite within the last 12 months for association with household and other explanatory factors in a UK cat cohort at age 2.5 years. The factors where  $P < 0.2$  (in bold) were taken on into multivariable analysis

| Explanatory factor                         | Category                      | Number of cases (owner reported abscess/cat bite) (%) | Number of controls (owner reported no abscess/cat bite) (%) | P-value      | OR (95% CI)             |
|--------------------------------------------|-------------------------------|-------------------------------------------------------|-------------------------------------------------------------|--------------|-------------------------|
| <b>Household</b>                           | <b>SCH</b>                    | <b>22 (13.2)</b>                                      | <b>145 (86.8)</b>                                           | <b>0.014</b> | <b>1.0</b>              |
|                                            | <b>AMCH</b>                   | <b>35 (9.1)</b>                                       | <b>348 (90.9)</b>                                           | <b>0.155</b> | <b>0.66 (0.38-1.17)</b> |
|                                            | <b>NMCH</b>                   | <b>11 (4.7)</b>                                       | <b>222 (95.3)</b>                                           | <b>0.004</b> | <b>0.33 (0.15-0.69)</b> |
| Tenure                                     | Own                           | 51 (8.6)                                              | 543 (91.4)                                                  | 0.931        | 1.0                     |
|                                            | Rent                          | 15 (8.4)                                              | 164 (91.6)                                                  |              |                         |
| Income                                     | ≤£24,999                      | 16 (7.8)                                              | 188 (92.2)                                                  | 0.197        | 1.0                     |
|                                            | £25,000-£49,999               | 21 (7.3)                                              | 268 (92.7)                                                  | 0.811        | 0.92 (0.47-1.81)        |
|                                            | ≥£50,000                      | 25 (11.7)                                             | 189 (88.3)                                                  | 0.190        | 1.55 (0.80-3.00)        |
| <b>Education</b>                           | <b>A-Levels or below</b>      | <b>9 (4.7)</b>                                        | <b>184 (95.3)</b>                                           | <b>0.018</b> | <b>1.0</b>              |
|                                            | <b>Degree or higher</b>       | <b>58 (10.5)</b>                                      | <b>497 (89.5)</b>                                           |              |                         |
| Age of owner                               | ≤24 years old                 | 9 (14.3)                                              | 54 (85.7)                                                   | 0.223        | 1.0                     |
|                                            | 25-54 years old               | 48 (8.5)                                              | 519 (91.5)                                                  | 0.131        | 0.55 (0.26-1.19)        |
|                                            | ≥ 55 years old                | 10 (6.9)                                              | 134 (93.1)                                                  | 0.099        | 0.45 (0.17-1.16)        |
| <b>Owned cat before</b>                    | <b>Yes</b>                    | <b>51 (8.1)</b>                                       | <b>578 (91.9)</b>                                           | <b>0.176</b> | <b>1.0</b>              |
|                                            | <b>No</b>                     | <b>17 (11.6)</b>                                      | <b>129 (88.4)</b>                                           |              |                         |
| Children in house                          | Yes                           | 17 (9.5)                                              | 162 (90.5)                                                  | 0.739        | 1.0                     |
|                                            | No                            | 51 (8.7)                                              | 536 (91.3)                                                  |              |                         |
| Playing time                               | Most days/quite often         | 62 (9.1)                                              | 617 (90.9)                                                  | <b>0.21</b>  | <b>1.0</b>              |
|                                            | Not often/never               | 5 (5.2)                                               | 91 (94.8)                                                   |              |                         |
| <b>Gender of cat</b>                       | <b>Male</b>                   | <b>45 (11.0)</b>                                      | <b>364 (89.0)</b>                                           | <b>0.02</b>  | <b>1.0</b>              |
|                                            | <b>Female</b>                 | <b>23 (6.2)</b>                                       | <b>347 (93.8)</b>                                           |              |                         |
| Breed of cat                               | Mixed/DSH/DLH                 | 55 (9.3)                                              | 539 (90.7)                                                  | 0.27         | <b>1.0</b>              |
|                                            | Pure breed                    | 12 (6.6)                                              | 170 (93.4)                                                  |              |                         |
| <b>Time spent outdoors</b>                 | <b>Never/hardly any</b>       | <b>2 (1.6)</b>                                        | <b>123 (98.4)</b>                                           | <b>0.017</b> | <b>1.0</b>              |
|                                            | <b>A little/equal amounts</b> | <b>57 (11.2)</b>                                      | <b>453 (88.8)</b>                                           |              |                         |
|                                            | <b>Most/all</b>               | <b>7 (12.7)</b>                                       | <b>48 (87.3)</b>                                            |              |                         |
| Neighbourhood cat density                  | 0- 5                          | 46 (8.4)                                              | 502 (91.6)                                                  | 0.59         | 1.0                     |
|                                            | 6+                            | 22 (9.6)                                              | 207 (90.4)                                                  |              |                         |
| <b>Neighbourhood cats stare in windows</b> | <b>Yes</b>                    | <b>35 (11.1)</b>                                      | <b>280 (88.9)</b>                                           | <b>0.061</b> | <b>1.0</b>              |
|                                            | <b>No</b>                     | <b>25 (7.0)</b>                                       | <b>334 (93.0)</b>                                           |              |                         |
| <b>Neighbourhood cats come in house</b>    | <b>Yes</b>                    | <b>20 (16.1)</b>                                      | <b>104 (16.1)</b>                                           | <b>0.028</b> | <b>1.0</b>              |
|                                            | <b>No</b>                     | <b>104 (83.9)</b>                                     | <b>416 (90.8)</b>                                           |              |                         |
| Neighbourhood cats come in garden          | Yes                           | 55 (10.8)                                             | 453 (89.2)                                                  | 0.590        | 1.0                     |
|                                            | No                            | 6 (8.7)                                               | 63 (91.3)                                                   |              |                         |
| <b>Insured</b>                             | <b>Yes</b>                    | <b>31 (7.3)</b>                                       | <b>396 (92.7)</b>                                           | <b>0.182</b> | <b>1.0</b>              |
|                                            | <b>no</b>                     | <b>34 (10.0)</b>                                      | <b>307 (90)</b>                                             |              |                         |
| Vaccinated                                 | Yes                           | 50 (8.6)                                              | 532 (91.4)                                                  | 0.820        | 1.0                     |
|                                            | No                            | 9 (9.3)                                               | 88 (90.7)                                                   |              |                         |
| <b>Neutered</b>                            | <b>Yes</b>                    | <b>68 (8.9)</b>                                       | <b>693 (91.1)</b>                                           | <b>0.140</b> | <b>1.0</b>              |
|                                            | <b>No</b>                     | <b>0 (0.0)*</b>                                       | <b>22 (100.0)</b>                                           |              |                         |
| <b>Location of house</b>                   | <b>Rural/village</b>          | <b>39 (12.0)</b>                                      | <b>285 (88.0)</b>                                           | <b>0.024</b> | <b>1.0</b>              |
|                                            | <b>Town/city</b>              | <b>29 (8.7)</b>                                       | <b>428 (93.7)</b>                                           |              |                         |
| <b>Presence of garden</b>                  | <b>Yes</b>                    | <b>67 (9.1)</b>                                       | <b>673 (90.9)</b>                                           | <b>0.161</b> | <b>1.0</b>              |
|                                            | <b>No</b>                     | <b>1 (2.3)</b>                                        | <b>42 (97.7)</b>                                            |              |                         |

| <b>Initial 'BS' postcode cohort</b> | <b>Non-BS postcode BS postcode</b> | <b>65 (9.2)<br/>3 (3.9)</b> | <b>642 (90.9)<br/>42 (97.7)</b> | <b>0.140</b> | <b>1.0<br/>0.41 (0.12-1.32)</b> |
|-------------------------------------|------------------------------------|-----------------------------|---------------------------------|--------------|---------------------------------|
| Negative interaction with owner     | Yes                                | 14 (10.6)                   | 118 (89.4)                      | 0.394        | 1.0                             |
|                                     | No                                 | 54 (8.3)                    | 596 (91.7)                      |              | 0.76 (0.41-1.42)                |

\*One entire (unneutered) cat changed from control- case to allow multivariable analysis to run

SCH= single cat household; AMCH= agonistic multi-cat household, NMCH= non-agonistic multi-cat household; DLH= domestic longhair; DSH= domestic shorthair

**Supplement 5** Univariable analysis for negative interactions with owner for association with household and other explanatory factors in a UK cat cohort at age 2.5 years. Factors with a P-value < 0.2 (in bold) were taken forward to multivariable analysis.

| Explanatory factor                         | Category               | Number of cases (owner reported negative interactions) (%) | Number of controls (owner reported no negative interactions) (%) | P-value                                                   | OR (95% CI)                                                      |
|--------------------------------------------|------------------------|------------------------------------------------------------|------------------------------------------------------------------|-----------------------------------------------------------|------------------------------------------------------------------|
| <b>Household</b>                           | <b>SCH</b>             | <b>40 (24.1)</b>                                           | <b>126 (75.9)</b>                                                | <b>P&lt;0.001</b><br><b>P= 0.206</b><br><b>p&lt;0.001</b> | <b>1.0</b><br><b>0.75 (0.49-1.17)</b><br><b>0.26 (0.14-0.48)</b> |
|                                            | <b>AMCH</b>            | <b>74 (19.3)</b>                                           | <b>309 (80.7)</b>                                                |                                                           |                                                                  |
|                                            | <b>NMCH</b>            | <b>18 (7.7)</b>                                            | <b>215 (92.3)</b>                                                |                                                           |                                                                  |
| Tenure                                     | Own                    | 96 (16.2)                                                  | 497 (83.8)                                                       | 0.290                                                     | 1.0                                                              |
|                                            | Rent                   | 35 (19.6)                                                  | 144 (80.4)                                                       |                                                           | 1.26 (0.82-1.93)                                                 |
| Income                                     | ≤£24,999               | 32 (15.7)                                                  | 172 (84.3)                                                       | 0.845                                                     | 1.0                                                              |
|                                            | £25,000-£49,999        | 50 (17.4)                                                  | 238 (82.6)                                                       | 0.623                                                     | 1.13 (0.70-1.83)                                                 |
|                                            | ≥£50,000               | 38 (17.8)                                                  | 176 (82.2)                                                       | 0.571                                                     | 1.16 (0.69- 1.94)                                                |
| Education                                  | A-Levels or below      | 31 (16.1)                                                  | 162 (83.9)                                                       | 0.617                                                     | 1.0                                                              |
|                                            | Degree or higher       | 98 (17.7)                                                  | 456 (82.3)                                                       |                                                           |                                                                  |
| <b>Age of owner</b>                        | <b>≤24 years old</b>   | <b>16 (25.4)</b>                                           | <b>47 (74.6)</b>                                                 | <b>0.02</b>                                               | <b>1.0</b>                                                       |
|                                            | <b>25-54 years old</b> | <b>101 (17.8)</b>                                          | <b>465 (82.2)</b>                                                | <b>0.15</b>                                               | <b>0.63 (0.35-1.17)</b>                                          |
|                                            | <b>≥ 55 years old</b>  | <b>15 (10.4)</b>                                           | <b>129 (89.6)</b>                                                | <b>0.01</b>                                               | <b>0.12 (0.16-0.75)</b>                                          |
| <b>Owned cat before</b>                    | <b>Yes</b>             | <b>90 (15.6)</b>                                           | <b>530 (84.4)</b>                                                | <b>0.04</b>                                               | <b>1.0</b><br><b>1.58 (1.00-2.46)</b>                            |
|                                            | <b>No</b>              | <b>33 (22.6)</b>                                           | <b>113 (77.4)</b>                                                |                                                           |                                                                  |
| Children in house                          | Yes                    | <b>30 (16.8)</b>                                           | <b>149 (83.2)</b>                                                | 0.882                                                     | 1.0                                                              |
|                                            | No                     | <b>101 (17.2)</b>                                          | <b>485 (82.8)</b>                                                |                                                           |                                                                  |
| Playing time                               | Most days/quite often  | 118 (17.4)                                                 | 561 (82.6)                                                       | 0.522                                                     | 1.0                                                              |
|                                            | Not often/never        | 14 (14.7)                                                  | 81 (85.3)                                                        |                                                           |                                                                  |
| <b>Gender of cat</b>                       | <b>Male</b>            | <b>56 (13.7)</b>                                           | <b>354 (86.3)</b>                                                | <b>0.01</b>                                               | <b>1.0</b><br><b>0.54 (0.32-0.91)</b>                            |
|                                            | <b>Female</b>          | <b>76 (20.6)</b>                                           | <b>293 (79.4)</b>                                                |                                                           |                                                                  |
| <b>Breed of cat</b>                        | <b>Mixed/DSH/DLH</b>   | <b>117 (19.7)</b>                                          | <b>476 (80.3)</b>                                                | <b>&lt;0.001</b>                                          | <b>1.0</b><br><b>1.64 (1.12-2.39)</b>                            |
|                                            | <b>Pure breed</b>      | <b>15 (8.2)</b>                                            | <b>167 (91.8)</b>                                                |                                                           |                                                                  |
| Time spent outdoors                        | Never/hardly any       | 19 (15.2)                                                  | 106 (84.8)                                                       | 0.61                                                      | 1.0                                                              |
|                                            | A little/equal amounts | 93 (18.3)                                                  | 416 (81.7)                                                       | 0.42                                                      | 1.25 (0.73-2.14)                                                 |
|                                            | Most/all               | 8 (14.5)                                                   | 47 (85.5)                                                        | 0.91                                                      | 0.95 (0.39-2.32)                                                 |
| <b>Neighbourhood cat density†</b>          | <b>0- 5</b>            | <b>80 (14.6)</b>                                           | <b>467 (85.4)</b>                                                | <b>0.007</b>                                              | <b>1.0</b><br><b>1.71 (1.16-2.53)</b>                            |
|                                            | <b>6+</b>              | <b>52 (22.7)</b>                                           | <b>177 (77.3)</b>                                                |                                                           |                                                                  |
| <b>Neighbourhood cats stare in windows</b> | <b>Yes</b>             | <b>65 (20.7)</b>                                           | <b>249 (79.3)</b>                                                | <b>0.027</b>                                              | <b>1.0</b><br><b>0.63 (0.42-0.95)</b>                            |
|                                            | <b>No</b>              | <b>51 (14.2)</b>                                           | <b>308 (85.8)</b>                                                |                                                           |                                                                  |
| Neighbourhood cats come in house           | Yes                    | 26 (21.0)                                                  | 98 (79.0)                                                        | 0.320                                                     | 1.0                                                              |
|                                            | No                     | 78 (17.1)                                                  | 379 (82.9)                                                       |                                                           | 0.78 (0.47-1.27)                                                 |
| Neighbourhood cats come in garden          | Yes                    | 95 (18.7)                                                  | 412 (81.3)                                                       | 0.574                                                     | 1.0                                                              |
|                                            | No                     | 11 (15.9)                                                  | 58 (84.1)                                                        |                                                           |                                                                  |
| Insured                                    | Yes                    | 70 (16.4)                                                  | 356 (83.6)                                                       | 0.749                                                     | 1.0                                                              |
|                                            | No                     | 59 (17.3)                                                  | 282 (82.7)                                                       |                                                           |                                                                  |
| Vaccinated                                 | Yes                    | 103 (17.7)                                                 | 478 (82.3)                                                       | 0.297                                                     | 1.0                                                              |
|                                            | No                     | 13 (13.4)                                                  | 84 (86.6)                                                        |                                                           |                                                                  |
| <b>Neutered</b>                            | <b>Yes</b>             | <b>132 (17.4)</b>                                          | <b>628 (82.6)</b>                                                | <b>0.149</b>                                              | <b>1.0</b><br><b>0.23 (0.84-1.83)</b>                            |
|                                            | <b>No</b>              | <b>0 (0.0)*</b>                                            | <b>22 (100)</b>                                                  |                                                           |                                                                  |
| Location of house                          | Rural/village          | 49 (15.2)                                                  | 274 (84.8)                                                       | 0.273                                                     | 1.0                                                              |
|                                            | Town/city              | 83 (18.2)                                                  | 374 (81.8)                                                       |                                                           |                                                                  |
| Presence of garden                         | Yes                    | 125 (16.9)                                                 | 614 (83.1)                                                       | 0.914                                                     | 1.0                                                              |
|                                            | No                     | 7 (16.3)                                                   | 36 (83.1)                                                        |                                                           |                                                                  |
| 'BS' postcode                              | Non-BS postcode        | 21 (17.1)                                                  | 585 (82.9)                                                       | 0.556                                                     | 1.0                                                              |

|                                 |             |           |           |     |                  |
|---------------------------------|-------------|-----------|-----------|-----|------------------|
|                                 | BS postcode | 11 (14.5) | 65 (85.5) |     | 0.82 (0.42-1.60) |
| Negative interaction with owner | N/A         | N/A       | N/A       | N/A | N/A              |

\*One entire (unneutered) cat changed from control to a case to allow multivariable analysis to run

† The number of cats from other households that the owner knows of in that are in the immediate neighbourhood

SCH= single cat household; AMCH= agonistic multi-cat household, NMCH= non-agonistic multi-cat household; DLH= domestic longhair; DSH= domestic shorthair
